# Supplementary material for: Role of ALDH3A1 in Maintaining the Balance between Alveolar Type 1 and Type 2 Cells in Emphysema: From Patient to Organoid Model
Source: Research Square preprint supplement (doi:10.21203/rs.3.rs-5665061/v1), 2024-12-30
Supplement: Supplementary file 1 [file 39fb7a2125078d59df72e178.docx]

**Supplementary material**

**Supplementary Figure 1: Population of lung cells in the control and CSE-emphysema model by scRNA-seq**

1. Identification of five cellular population in lung cells
2.
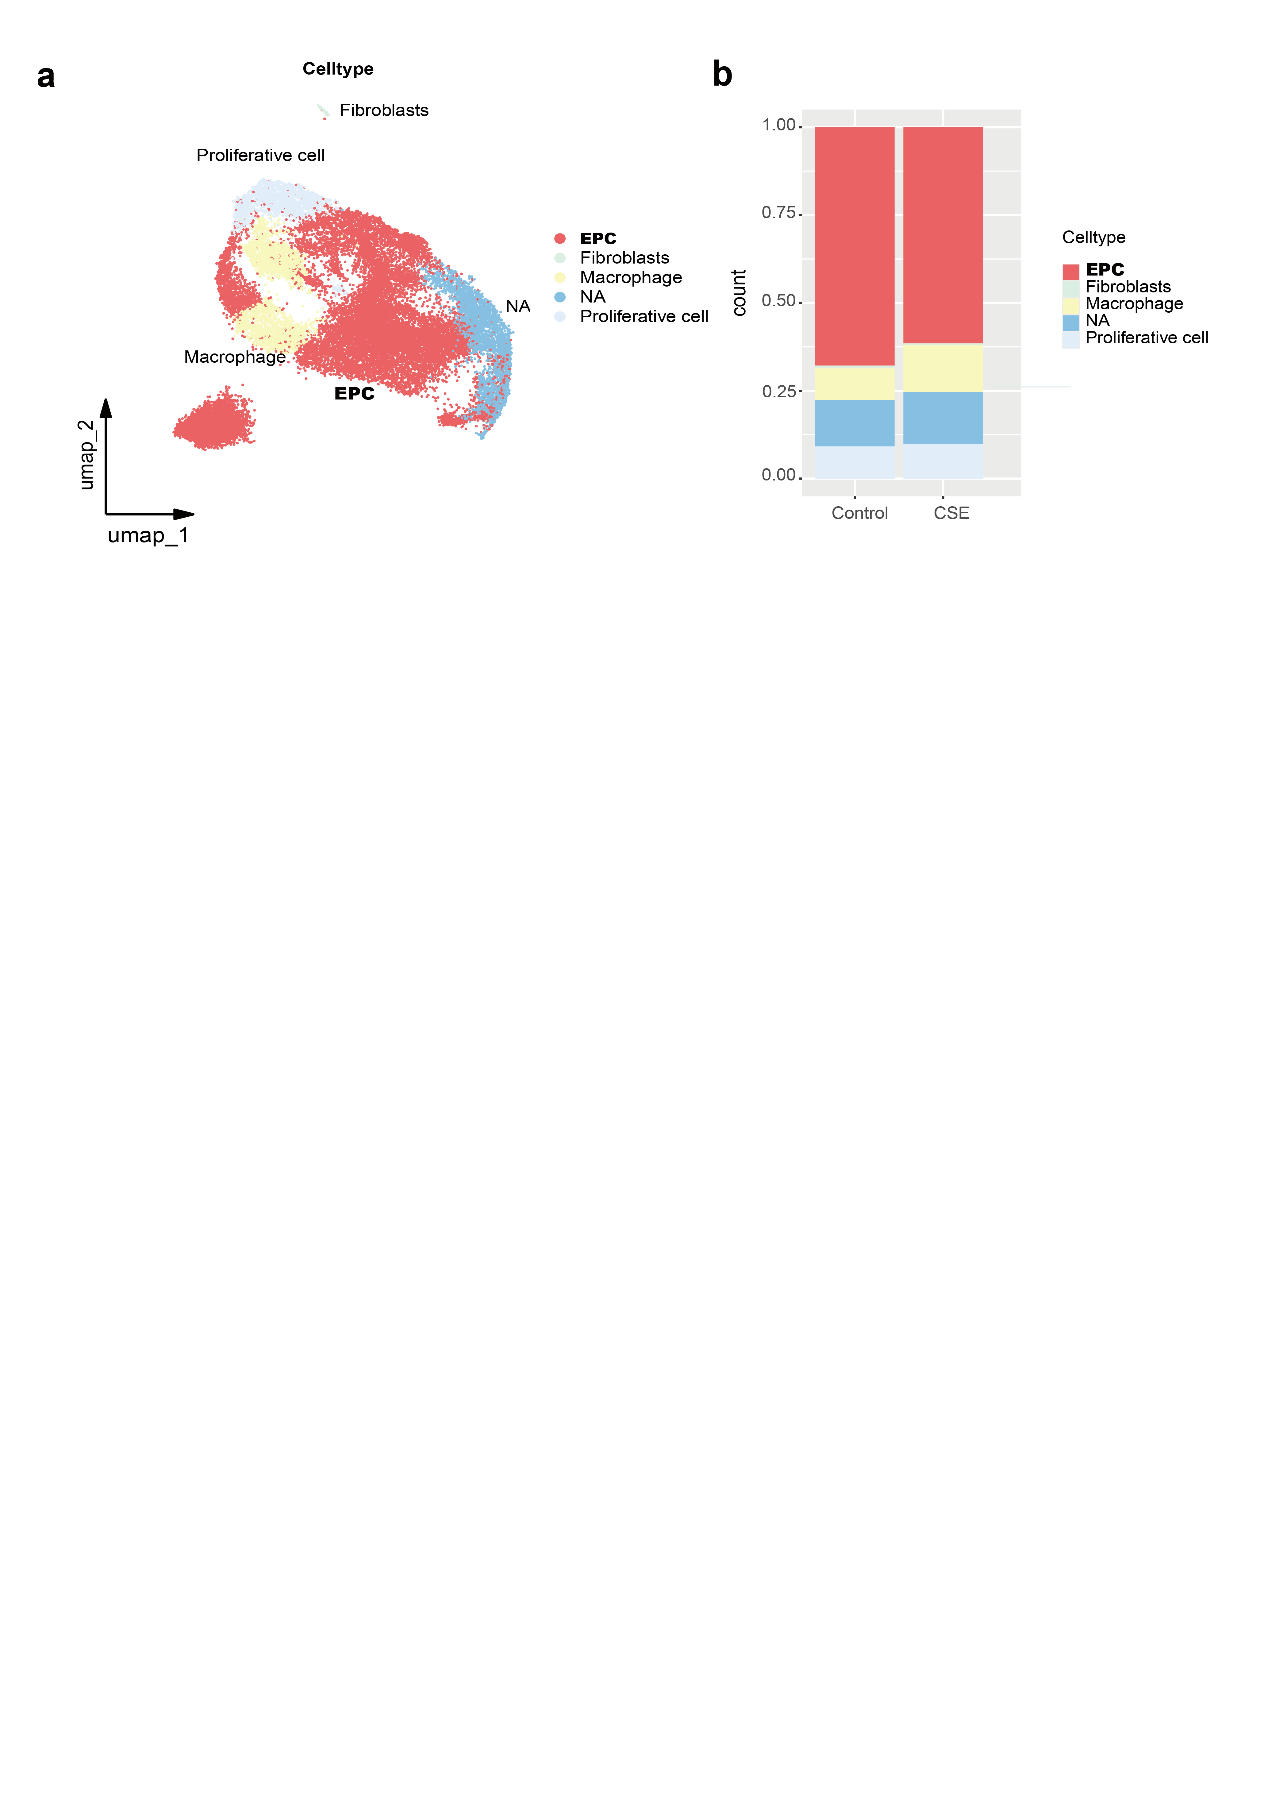
Abundance distribution according to cellular population.

**Supplementary Figure 2: Pulmonary function of mice.**

Data are expressed as mean ± SEM. *P* values were determined using one-way ANOVA. n = 10 mice per group.
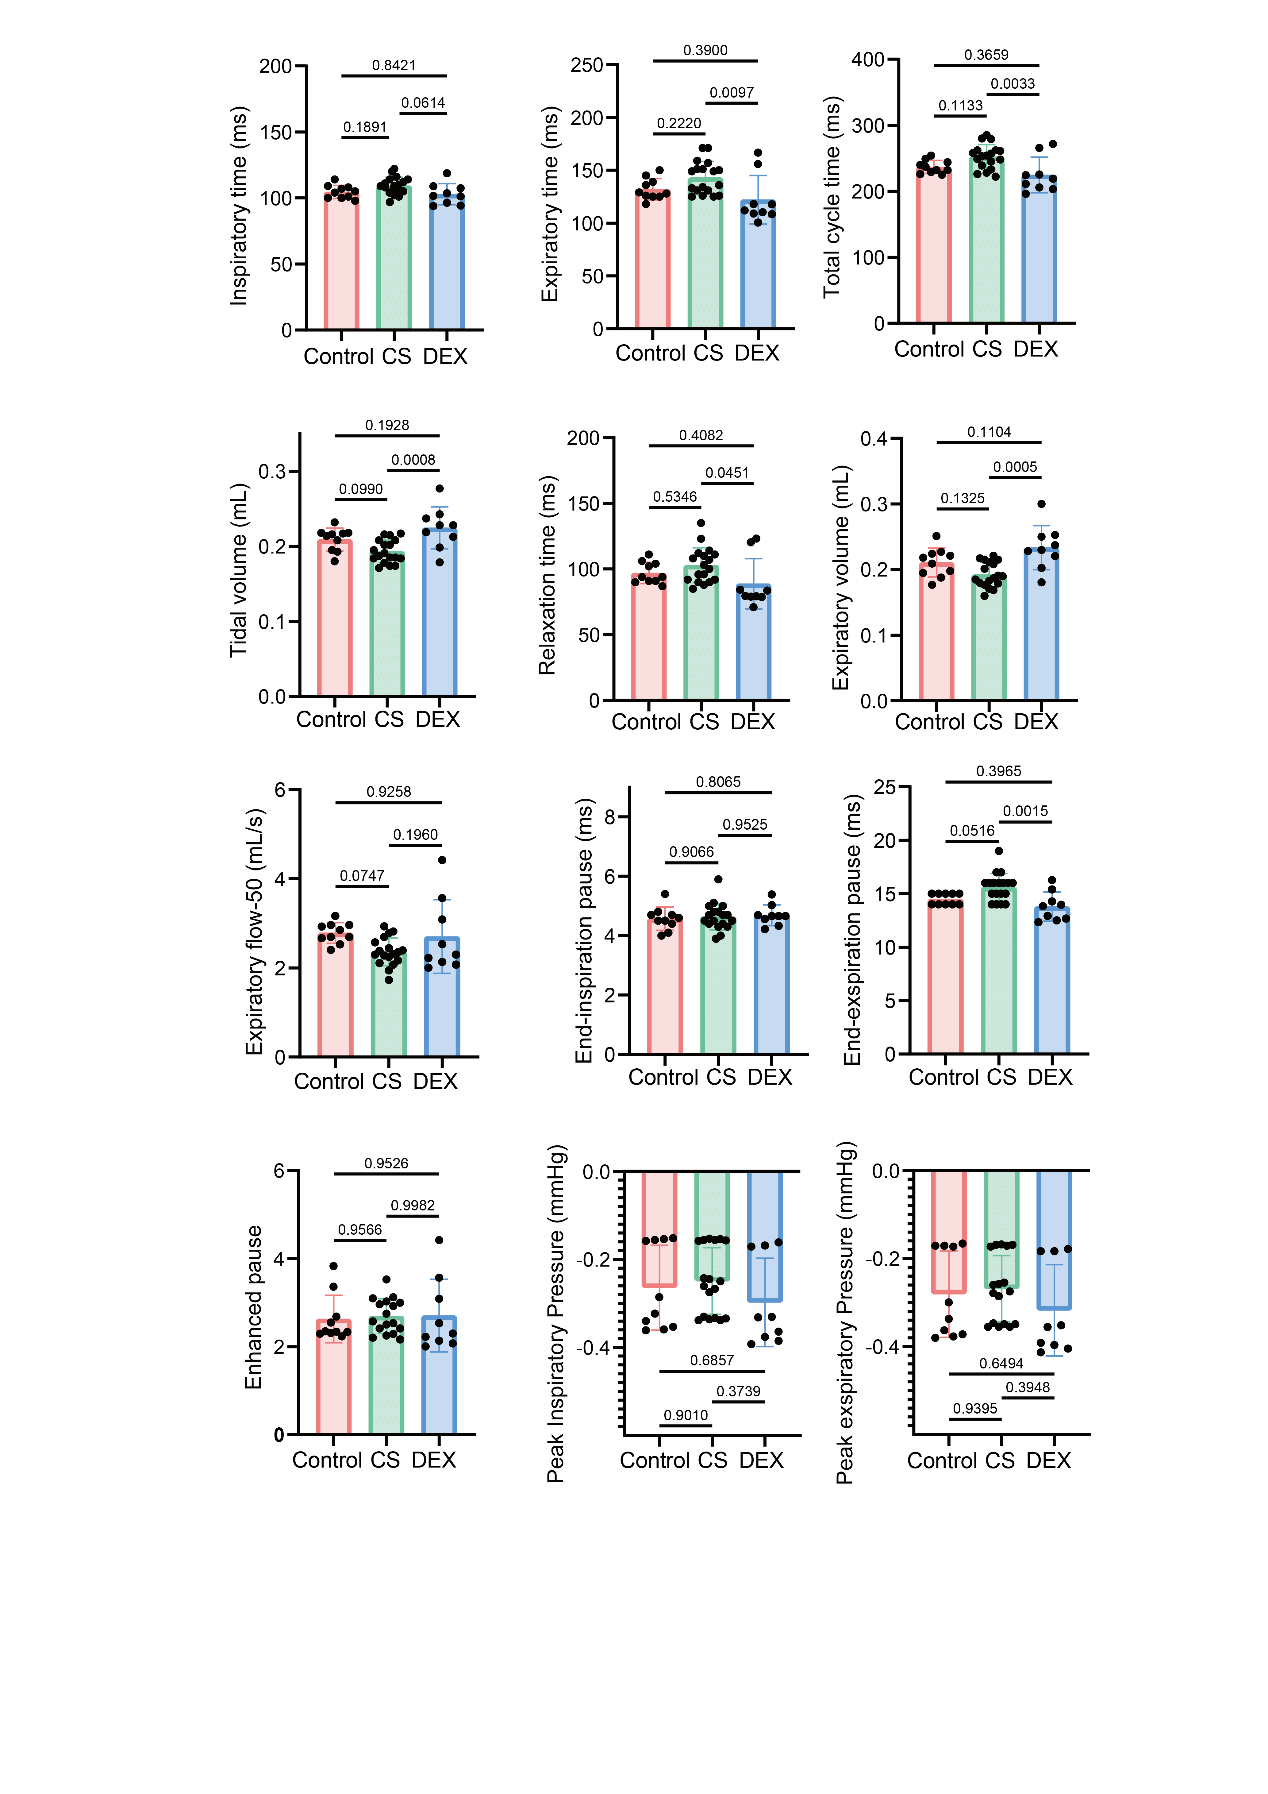


**Supplementary WB original image**


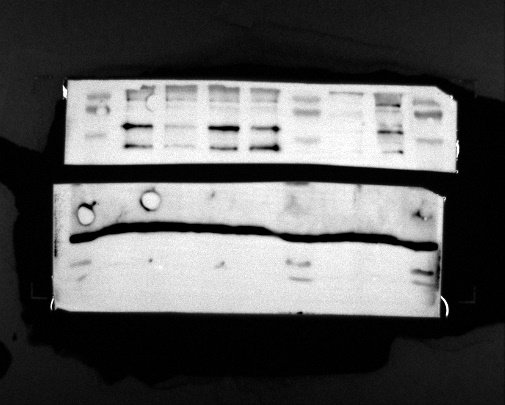


**ALDH3A1**


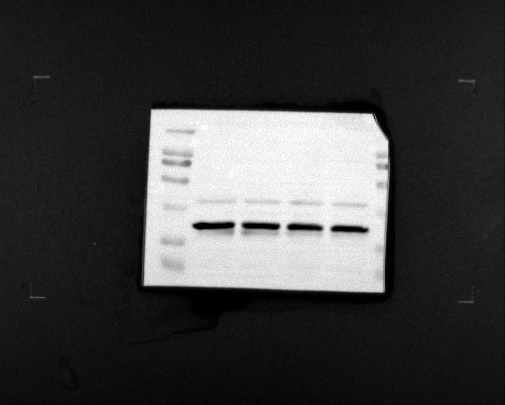


**GAPDH**
